# Supplementary material for: Improved SARS-CoV-2 Spike Glycoproteins for Pseudotyping Lentiviral Vectors
Source: Frontiers journal article supplement (doi:10.3389/fviro.2021.793320), 2021-11-26
Supplement: Data_Sheet_2.xlsx [file Data_Sheet_2.xlsx]

## Sheet: Primers
Forward Primers	Sequence		Reverse Primers	Sequence
oPAF147 - VSV-G backbone to Spike	GAATTCACCCCACCAGTG		oPAR43 - VSV-G backbone to Spike	AGTGTCAGAATTCTTTGCCAA
oPAF149 - Spike - Globin	ATTCTGAGTCCAAGCTAGG		oPAR46 - Spike - Globin	AGAATCCAGATGCTCAAGGC
oPAF176 - Spike D614G mutant - IDT	CTCTATCAAGgCGTCAACTGTACG		oPAR56 - Spike D614G mutant - IDT	GACCGCGACTTGGTTGGA
oPAF177 - Spike D614G mutant - Ou	CTGTACCAAGgCGTGAATTGCAC		oPAR57 - Spike D614G mutant - Ou	CACGGCTACCTGGTTGCT
oPAF184 - phospho HA insert into D614G Ou	tgcagaatatgcatcTAATGAaagcttatcgataccg		oPAR63 - HA insert D614G Ou	GCTCGTCATGCAGCAAAGCA
oPAF228 - Phospho-Spike C-terminus 19aa deletion	TAATGAaagcttatcgataccgt		oPAR103 - Spike del 19	GCAACATGATCCGCAAGAG
oPAF213 - Spike - IDT - VUI 202012-01	CTATAATGCTGTGCTGCATG		oPAR96 - Ou-D614G-HA to G614D	CACGGCTACCTGGTTGCT
oPAF214 - Spike - Ou - VUI 202012-01	CCATTATGCTTTGCTGCATG		oPAR97 - Ou - E484K	CACGGTGTTGAACCCGCT
oPAF221 - Ou-D614G-HA to G614D	CTGTACCAAGaCGTGAATTGCACAG		oPAR108 - L18F for B.1.351	TGGCTACTAACGAGAGGC
oPAF222 - Ou - E484K	TAACGGTGTGaAAGGATTTAACTGCTAC		oPAR109 - del241-243 for B.1.351	TGTTTGAAAGCGAGTTATGTTTATTC
oPAF232 - L18F for B.1.351	ATGCGTCAACtTTACTACTAGAAC		oPAR110 - Insert Tyr at 145 for B.1.1.7	CACACCCAGGAAGGGATC
oPAF233 - del241-243 for B.1.351	CTGCATCGCAGTTACCTC		oPAR127 - open for B.1.617	ACCGACCTTAGAATCGAGGT
oPAF234 - Insert Tyr at 145 for B.1.1.7	tacCATAAGAATAACAAGAGCTGGATG		oPAR128 - T19R for B.1.617.2	CATTGGCTACTAACGAGAG
oPAF282 - open for B.1.617	GCAATCTGTCACGACGGTAA		oPAR129 - delta157-158 for B.1.617.2	TTCGGATTCCATCCAGCT
oPAF283 - T19R for B.1.617.2	CGTCAACCTTcgTACTAGAACCCAG
oPAG284 - delta157-158 for B.1.617.2	GTTTACAGTTCCGCTAAC
Sequencing Primers	Sequence
oPAF150 - Spike - IDT	TTCATGCCATTCATGTCTCC
oPAF151 - Spike - IDT	AAGATTTATAGCAAACACACACCC
oPAF152 - Spike - IDT	TACGAATTTGTGCCCATTTG
oPAF153 - Spike - IDT	GACCAACACCTCCAACCAAG
oPAF154 - Spike - IDT	ACCAAGACATCCGTCGATTG
oPAF155 - Spike - IDT	TCACCGATGAGATGATAGCG
oPAF156 - Spike - IDT	GGGCGCCTCCAAAGTCTG
oPAF157 - Spike - IDT	AATACAGTCTACGATCCTCTGC
oPAF158 - Spike - Ou	TTGGTTTCATGCTATCCATGT
oPAF159 - Spike - Ou	TAATAACGCTACAAATGTTGTGATAAA
oPAF160 - Spike - Ou	AGTAGTTCAGGATGGACAGCAG
oPAF161 - Spike - Ou	CCGACTAAGCTGAACGATCTC
oPAF162 - Spike - Ou	AGAGCACTAACTTGGTGAAG
oPAF163 - Spike - Ou	GGAGCGGAACATGTGAATAA
oPAF164 - Spike - Ou	GCAGATATACAAAACACCGCC
oPAF165 - Spike - Ou	GAGAACCAAAAGCTCATCGC
oPAF166 - Spike - Ou	GTCATTTCCCCAGTCAGCAC
oPAF167 - Spike - Ou	CTCAACGAAGTGGCCAAGA
oPAR45 - Spike - IDT	CTCTGTGGACGCGAAGTACA

## Sheet: Double Stranded DNA Fragments
Gene Block		Sequence
oPAG40 - Spike-idt-Part1		TTGGCAAAGAATTCTGACACTATGTTCGTGTTCCTGGTACTCCTTCCTTTGGTGTCTTCCCAGTGTGTAAATCTTACCACTCGGACCCAGCTTCCACCCGCCTACACCAACAGTTTCACACGCGGCGTCTACTATCCTGACAAGGTGTTTAGGAGTTCAGTCTTGCACTCAACTCAAGACTTGTTCCTCCCTTTCTTTAGCAATGTGACGTGGTTTCATGCCATTCATGTCTCCGGCACAAACGGAACGAAGCGCTTTGATAATCCTGTGCTCCCGTTCAACGATGGAGTGTACTTCGCGTCCACAGAGAAGAGCAATATCATTCGAGGTTGGATCTTCGGAACGACACTCGACTCAAAGACGCAGTCCCTTCTCATCGTCAATAATGCCACGAACGTG…
oPAG41 - Spike-idt-Part2		ACTTGGAGGGTTTACTCTACAGGAAGCAATGTCTTTCAAACACGAGCCGGGTGTCTGATCGGAGCAGAACACGTTAACAACAGCTACGAATGTGACATACCAATAGGCGCAGGGATTTGTGCTTCATATCAGACACAGACCAATAGCCCGCGGAGAGCGAGAAGCGTAGCAAGCCAAAGCATCATCGCGTACACGATGAGCCTCGGAGCAGAGAACAGCGTCGCGTATAGCAATAATTCAATAGCTATCCCAACAAATTTCACTATTTCGGTCACCACTGAGATTCTGCCGGTCTCCATGACCAAGACATCCGTCGATTGTACTATGTACATATGCGGCGACAGCACGGAGTGCAGTAACTTGCTCCTTCAGTACGGTTCCTTCTGTACGCAGCTTAAC…
oPAG42 - Spike-idt-ALAYT-Part2		ACTTGGAGGGTTTACTCTACAGGAAGCAATGTCTTTCAAACACGAGCCGGGTGTCTGATCGGAGCAGAACACGTTAACAACAGCTACGAATGTGACATACCAATAGGCGCAGGGATTTGTGCTTCATATCAGACACAGACCAATAGCCCGCGGAGAGCGAGAAGCGTAGCAAGCCAAAGCATCATCGCGTACACGATGAGCCTCGGAGCAGAGAACAGCGTCGCGTATAGCAATAATTCAATAGCTATCCCAACAAATTTCACTATTTCGGTCACCACTGAGATTCTGCCGGTCTCCATGACCAAGACATCCGTCGATTGTACTATGTACATATGCGGCGACAGCACGGAGTGCAGTAACTTGCTCCTTCAGTACGGTTCCTTCTGTACGCAGCTTAAC…
oPAG43 - Spike-idt-HA-Part2		acttggagggtttactctacaggaagcaatgtctttcaaacacgagccgggtgtctgatcggagcagaacacgttaacaacagctacgaatgtgacataccaataggcgcagggatttgtgcttcatatcagacacagaccaatagcccgcggagagcgagaagcgtagcaagccaaagcatcatcgcgtacacgatgagcctcggagcagagaacagcgtcgcgtatagcaataattcaatagctatcccaacaaatttcactatttcggtcaccactgagattctgccggtctccatgaccaagacatccgtcgattgtactatgtacatatgcggcgacagcacggagtgcagtaacttgctccttcagtacggttccttctgtacgcagcttaac…
oPAG44 - Spike-idt-MLVTR-Part2		ACTTGGAGGGTTTACTCTACAGGAAGCAATGTCTTTCAAACACGAGCCGGGTGTCTGATCGGAGCAGAACACGTTAACAACAGCTACGAATGTGACATACCAATAGGCGCAGGGATTTGTGCTTCATATCAGACACAGACCAATAGCCCGCGGAGAGCGAGAAGCGTAGCAAGCCAAAGCATCATCGCGTACACGATGAGCCTCGGAGCAGAGAACAGCGTCGCGTATAGCAATAATTCAATAGCTATCCCAACAAATTTCACTATTTCGGTCACCACTGAGATTCTGCCGGTCTCCATGACCAAGACATCCGTCGATTGTACTATGTACATATGCGGCGACAGCACGGAGTGCAGTAACTTGCTCCTTCAGTACGGTTCCTTCTGTACGCAGCTTAAC…
oPAG45 - Spike-ou2020-Part1		TTGGCAAAGAATTCTGACACTATGTTCGTTTTCCTTGTTCTGTTGCCTCTCGTTAGTAGCCAATGCGTCAACCTTACTACTAGAACCCAGCTCCCTCCAGCATATACCAACTCTTTCACCAGGGGCGTATATTACCCGGACAAAGTGTTCCGCTCAAGTGTGCTGCATTCTACGCAGGACCTTTTCTTGCCCTTTTTCAGTAATGTTACTTGGTTTCATGCTATCCATGTGTCTGGAACTAACGGAACCAAGCGCTTTGACAACCCCGTCCTCCCTTTCAACGATGGCGTGTACTTCGCTTCCACGGAAAAGTCAAACATAATTCGCGGCTGGATCTTTGGTACAACACTCGACTCAAAGACGCAGAGCCTGCTGATCGTTAATAACGCTACAAATGTT…
oPAG46 - Spike-ou2020-Part2		TACAGCACTGGTAGTAACGTCTTCCAGACGAGAGCCGGTTGCTTGATCGGAGCGGAACATGTGAATAACTCCTACGAGTGCGACATCCCCATCGGAGCCGGTATATGCGCCTCTTATCAGACACAAACTAACTCACCCAGGAGAGCCCGCAGTGTGGCTTCTCAAAGCATTATAGCATACACTATGTCTCTTGGTGCCGAAAATTCCGTGGCCTATTCTAACAATTCAATCGCCATCCCAACCAACTTCACAATTAGCGTGACTACCGAAATACTGCCTGTGAGCATGACGAAAACCAGCGTAGACTGCACTATGTATATCTGTGGAGACTCCACTGAGTGCTCCAACCTTCTCCTGCAGTACGGTAGCTTCTGTACCCAATTGAACCGCGCCCTTACA…
oPAG47 - Spike-ou2020-MLVTR-Part2		TACAGCACTGGTAGTAACGTCTTCCAGACGAGAGCCGGTTGCTTGATCGGAGCGGAACATGTGAATAACTCCTACGAGTGCGACATCCCCATCGGAGCCGGTATATGCGCCTCTTATCAGACACAAACTAACTCACCCAGGAGAGCCCGCAGTGTGGCTTCTCAAAGCATTATAGCATACACTATGTCTCTTGGTGCCGAAAATTCCGTGGCCTATTCTAACAATTCAATCGCCATCCCAACCAACTTCACAATTAGCGTGACTACCGAAATACTGCCTGTGAGCATGACGAAAACCAGCGTAGACTGCACTATGTATATCTGTGGAGACTCCACTGAGTGCTCCAACCTTCTCCTGCAGTACGGTAGCTTCTGTACCCAATTGAACCGCGCCCTTACA…
oPAG59 - Spike - Ou - VUI 202012		TTGGCAAAGAATTCTGACACTATGTTCGTTTTCCTTGTTCTGTTGCCTCTCGTTAGTAGCCAATGCGTCAACCTTACTACTAGAACCCAGCTCCCTCCAGCATATACCAACTCTTTCACCAGGGGCGTATATTACCCGGACAAAGTGTTCCGCTCAAGTGTGCTGCATTCTACGCAGGACCTTTTCTTGCCCTTTTTCAGTAATGTTACTTGGTTTCATGCTATCTCTGGAACTAACGGAACCAAGCGCTTTGACAACCCCGTCCTCCCTTTCAACGATGGCGTGTACTTCGCTTCCACGGAAAAGTCAAACATAATTCGCGGCTGGATCTTTGGTACAACACTCGACTCAAAGACGCAGAGCCTGCTGATCGTTAATAACGCTACAAATGTTGTGATA…
oPAG60 - Spike - Ou - VUI 202012		CGGAGCGGAACATGTGAATAACTCCTACGAGTGCGACATCCCCATCGGAGCCGGTATATGCGCCTCTTATCAGACACAAACTAACTCACACAGGAGAGCCCGCAGTGTGGCTTCTCAAAGCATTATAGCATACACTATGTCTCTTGGTGCCGAAAATTCCGTGGCCTATTCTAACAATTCAATCGCCATCCCAATCAACTTCACAATTAGCGTGACTACCGAAATACTGCCTGTGAGCATGACGAAAACCAGCGTAGACTGCACTATGTATATCTGTGGAGACTCCACTGAGTGCTCCAACCTTCTCCTGCAGTACGGTAGCTTCTGTACCCAATTGAACCGCGCCCTTACAGGCATCGCTGTTGAGCAAGATAAGAATACCCAGGAAGTTTTTGCCCA…
oPAG61 - Spike - Ou - 501YV2		TTGGCAAAGAATTCTGACACTATGTTCGTTTTCCTTGTTCTGTTGCCTCTCGTTAGTAGCCAATGCGTCAACCTTACTACTAGAACCCAGCTCCCTCCAGCATATACCAACTCTTTCACCAGGGGCGTATATTACCCGGACAAAGTGTTCCGCTCAAGTGTGCTGCATTCTACGCAGGACCTTTTCTTGCCCTTTTTCAGTAATGTTACTTGGTTTCATGCTATCCATGTGTCTGGAACTAACGGAACCAAGCGCTTTGCCAACCCCGTCCTCCCTTTCAACGATGGCGTGTACTTCGCTTCCACGGAAAAGTCAAACATAATTCGCGGCTGGATCTTTGGTACAACACTCGACTCAAAGACGCAGAGCCTGCTGATCGTTAATAACGCTACAAATGTT…
oPAG62 - Spike - Ou - 501YV2		CGGAGCGGAACATGTGAATAACTCCTACGAGTGCGACATCCCCATCGGAGCCGGTATATGCGCCTCTTATCAGACACAAACTAACTCACCCAGGAGAGCCCGCAGTGTGGCTTCTCAAAGCATTATAGCATACACTATGTCTCTTGGTGTCGAAAATTCCGTGGCCTATTCTAACAATTCAATCGCCATCCCAACCAACTTCACAATTAGCGTGACTACCGAAATACTGCCTGTGAGCATGACGAAAACCAGCGTAGACTGCACTATGTATATCTGTGGAGACTCCACTGAGTGCTCCAACCTTCTCCTGCAGTACGGTAGCTTCTGTACCCAATTGAACCGCGCCCTTACAGGCATCGCTGTTGAGCAAGATAAGAATACCCAGGAAGTTTTTGCCCA…
oPAG67 - B.1.617.1		ACCTCGATTCTAAGGTCGGTGGTAACTACAATTACCGGTACCGCTTGTTTAGGAAGTCAAACCTGAAGCCTTTCGAGAGGGATATTTCAACCGAAATCTATCAAGCGGGTTCAACACCGTGTAACGGTGTGCAAGGATTTAACTGCTACTTCCCCCTGCAGTCTTACGGATTCCAGCCAACCAATGGCGTGGGTTACCAACCTTATCGCGTGGTGGTTCTGAGTTTCGAACTGTTGCACGCTCCCGCCACGGTATGCGGTCCCAAGAAGAGCACTAACTTGGTGAAGAATAAGTGCGTGAATTTCAATTTCAATGGCCTCACTGGAACTGGAGTGCTGACCGAATCCAATAAGAAGTTCTTGCCCTTCCAGCAGTTCGGAAGAGACATTGCTGACACAA…
oPAG68 - B.1.617.2		ACCTCGATTCTAAGGTCGGTGGTAACTACAATTACCGGTACCGCTTGTTTAGGAAGTCAAACCTGAAGCCTTTCGAGAGGGATATTTCAACCGAAATCTATCAAGCGGGTTCAAAACCGTGTAACGGTGTGCAAGGATTTAACTGCTACTTCCCCCTGCAGTCTTACGGATTCCAGCCAACCAATGGCGTGGGTTACCAACCTTATCGCGTGGTGGTTCTGAGTTTCGAACTGTTGCACGCTCCCGCCACGGTATGCGGTCCCAAGAAGAGCACTAACTTGGTGAAGAATAAGTGCGTGAATTTCAATTTCAATGGCCTCACTGGAACTGGAGTGCTGACCGAATCCAATAAGAAGTTCTTGCCCTTCCAGCAGTTCGGAAGAGACATTGCTGACACAA…

## Sheet: Primer Probe ddPCR
Primers Fwd	Sequence
oPAF -SDC4	CAGGGTCTGGGAGCCAAGT
eGFP616F	CTGCTGCCCGACAACCA
Primers Rev	Sequence
oPAR - SDC4	GCACAGTGCTGGACATTGACA
eGFP705R	GAACTCCAGCAGGACCATGTG
Probes	Sequence	Modification
oPAP-SDC4	CCCACCGAACCCAAGAAACTAGAGGAGAAT	HEX
eGFP653Pr	CCCTGAGCAAAGACCCCAACGAGA	FAM
